# Supplementary material for: Expression of human RECQL5 in Saccharomyces cerevisiae causes transcription defects and transcription-associated genome instability
Source: PubMed Central journal article supplement (PMC11128410; doi:10.1007/s00438-024-02152-3), 2024-05-26

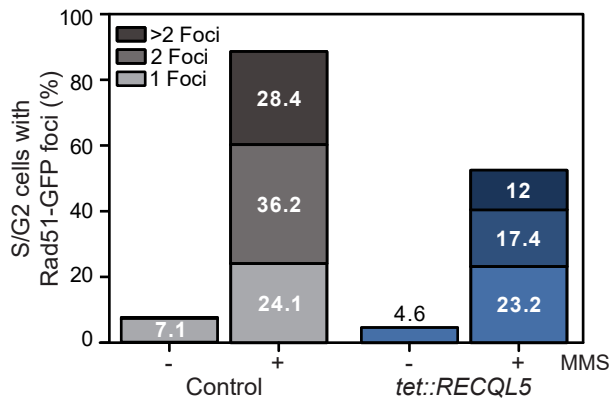

Supplement: 438_2024_2152_MOESM2_ESM.pdf [file 438_2024_2152_MOESM2_ESM.pdf]
